# Supplementary material for: Enhancing the Topical Antibacterial Activity of Fusidic Acid via Embedding into Cinnamon Oil Nano-Lipid Carrier
Source: MDPI journal article supplement (doi:10.3390/gels10040268), 2024-04-16
Supplement: s1 [file s1]

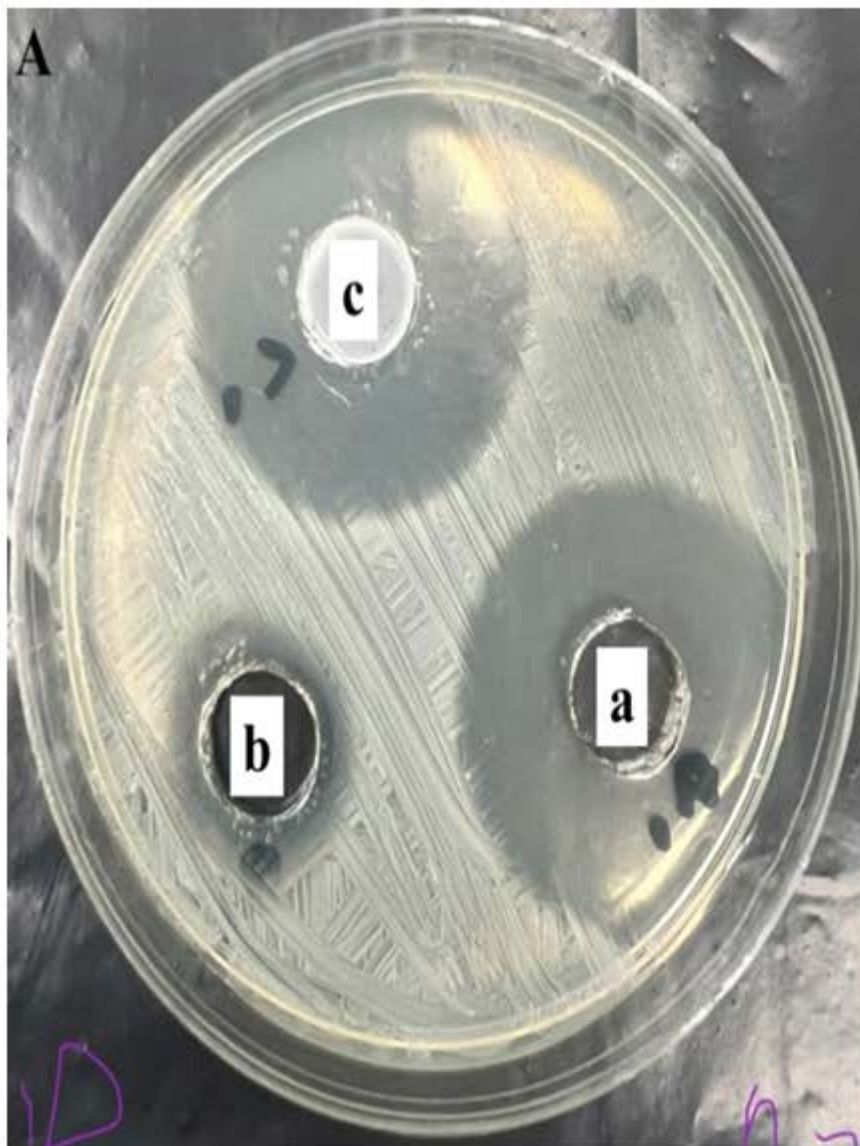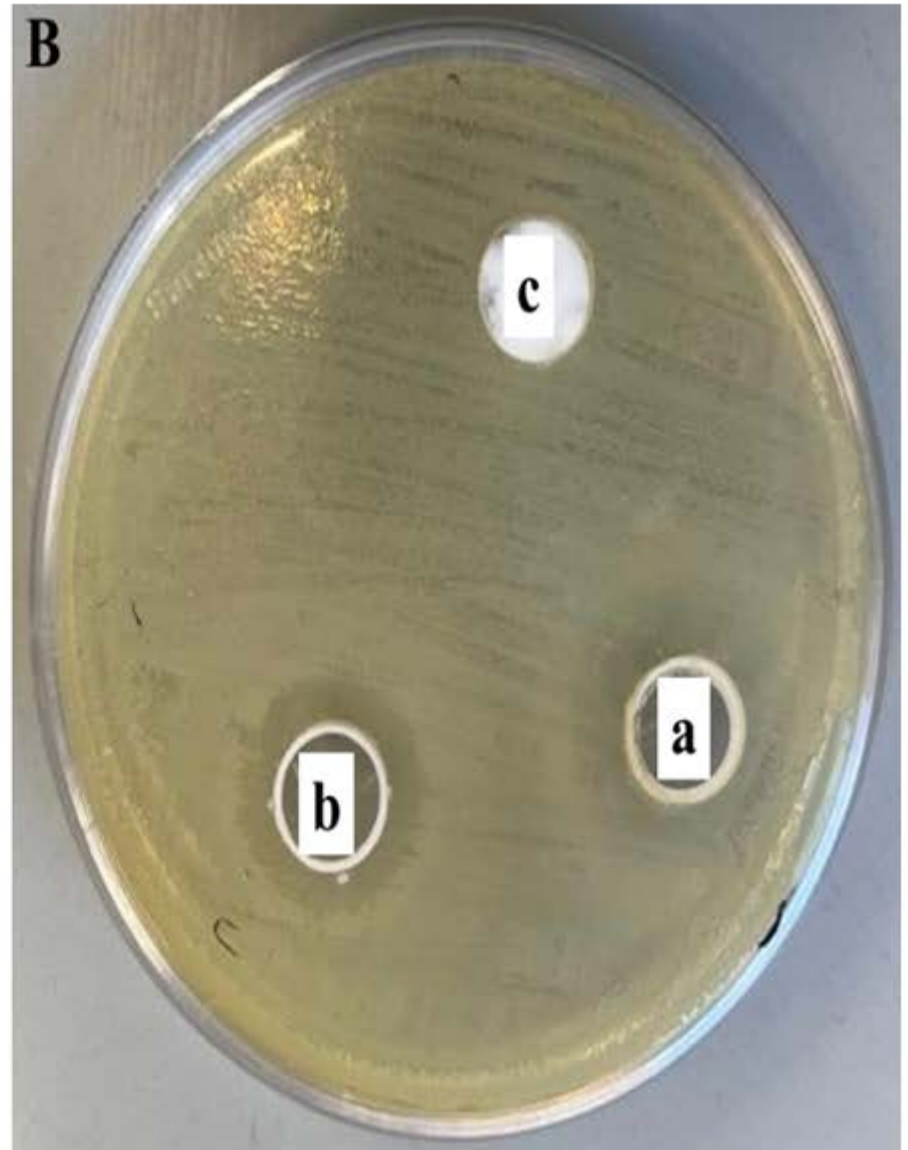

**Figure S1.** Inhibition zone diameter caused by investigated formulations; a) FA-NE-hydrogel, b) blank NE-hydrogel and c) marketed FA on different bacteria; A) *Staphylococcus aureus*, and B) *E. coli*.
